# Supplementary material for: Mental Health among Higher Education Students during the COVID-19 Pandemic: A Cross-Sectional Survey from Lithuania
Source: MDPI journal article supplement (doi:10.3390/ijerph182312737), 2021-12-02
Supplement: s1 [file s1]

## Supplementary data

### Questionnaire

1. What is your age? \_\_\_\_
2. What is your sex?
  - Male
  - Female
3. What is your study field?
  - Social sciences (e.g., law, political science, psychology, economics, management, sports)
  - Biomedical sciences (e.g., biology, medicine, odontology, pharmacy)
  - Physical sciences (e.g., mathematics, physics, biochemistry, geology, informatics, geography)
  - Technological sciences (e.g., logistics, chemistry, computer engineering)
  - Arts (e.g., music, art, theater, architecture, audiovisual art)
  - Humanities (e.g., philosophy, philology, history, art history)
4. During your studies you live:
  - Alone
  - With your family
  - With other students or peers
  - With your partner
5. Do you agree with the following statements?

|                                                           | Strongly disagree     | Disagree              | Neither agree, nor disagree | Agree                 | Strongly agree        |
|-----------------------------------------------------------|-----------------------|-----------------------|-----------------------------|-----------------------|-----------------------|
| During COVID-19 pandemic my physical health got worse     | <input type="radio"/> | <input type="radio"/> | <input type="radio"/>       | <input type="radio"/> | <input type="radio"/> |
| During COVID-19 pandemic I feel more anxiety than usually | <input type="radio"/> | <input type="radio"/> | <input type="radio"/>       | <input type="radio"/> | <input type="radio"/> |
| During COVID-19 pandemic I feel more sadness than usually | <input type="radio"/> | <input type="radio"/> | <input type="radio"/>       | <input type="radio"/> | <input type="radio"/> |
| During COVID-19 pandemic my academic                      | <input type="radio"/> | <input type="radio"/> | <input type="radio"/>       | <input type="radio"/> | <input type="radio"/> |

|                                                                                            |                       |                       |                       |                       |                       |
|--------------------------------------------------------------------------------------------|-----------------------|-----------------------|-----------------------|-----------------------|-----------------------|
| performance<br>got worse                                                                   |                       |                       |                       |                       |                       |
| During<br>COVID-19<br>pandemic I<br>have no<br>comfortable<br>place to<br>study            | <input type="radio"/> |
| During<br>COVID-19<br>pandemic I<br>find it more<br>difficult to<br>focus on my<br>studies | <input type="radio"/> |
| During<br>COVID-19<br>pandemic<br>my personal<br>relationships<br>got worse                | <input type="radio"/> |
| During<br>COVID-19<br>pandemic<br>my income<br>became<br>lower                             | <input type="radio"/> |
| During<br>COVID-19<br>pandemic<br>my career<br>prospects<br>got worse                      | <input type="radio"/> |

6. Were you infected with COVID-19?

- ☐ Yes
- ☐ No

7. Were you hospitalized because of COVID-19?

- ☐ Yes
- ☐ No

8. Was any of your family members infected with COVID-19?

- ☐ Yes
- ☐ No

9. Was any of your family members hospitalized because of COVID-19?

- ☐ Yes
- ☐ No

10. Do you usually see a solution to problems and difficulties that other people find hopeless?

- ☐ Yes, often
- ☐ Yes, sometimes
- ☐ No

11. Do you usually feel that your daily life is a source of personal satisfaction?

- Yes, often
  - Yes, sometimes
  - No
12. Do you usually feel that the things that happen to you in your daily life are hard to understand?
- Yes, often
  - Yes, sometimes
  - No

After reading each statement, answer how you were feeling over the past week.

13. I feel tense or 'wound up'
- Most of the time
  - A lot of the time
  - From time to time, occasionally
  - Not at all
14. I still enjoy the things I used to enjoy
- Definitely as much
  - Not quite so much
  - Only a little
  - Hardly at all
15. I get a sort of frightened feeling as if something awful is about to happen
- Very definitely and quite badly
  - Yes, but not too badly
  - A little, but it doesn't worry me
  - Not at all
16. I can laugh and see funny side of the things
- As much as I always could
  - Not quite so much now
  - Definitely not so much now
  - Not at all
17. Worrying thoughts go through my mind
- A great deal of the time
  - A lot of the time
  - From time to time, but not too often
  - Only occasionally
18. I feel cheerful
- Not at all
  - Not often
  - Sometimes
  - Most of the time
19. I can sit at ease and feel relaxed
- Definitely
  - Usually
  - Not often
  - Not at all
20. I feel as if I am slowed down
- Nearly all the time
  - Very often
  - Sometimes
  - Not at all
21. I get sort of frightened feeling like 'butterflies' in the stomach
- Not at all
  - Occasionally
  - Quite often

- Very often
- 22. I have lost interest in my appearance
  - Definitely
  - I don't take as much care as I should
  - I may not take quite as much care
  - I take just as much care as ever
- 23. I feel restless as I have to be on the move
  - Very much indeed
  - Quite a lot
  - Not very much
  - Not at all
- 24. I look forward with enjoyment to things
  - As much as I ever did
  - Rather as I ever did
  - Definitely less than I used to
  - Hardly at all
- 25. I get sudden feeling of panic
  - Very often indeed
  - Quite often
  - Not very often
  - Not at all
- 26. I can enjoy a good book or radio or TV program
  - Often
  - Sometimes
  - Not often
  - Very seldom
- 27. How do you evaluate your health?
  - 5 Very good
  - 4 Good
  - 3 Average
  - 2 Poor
  - 1 Very poor

Please answer the questions related to the risk of suicide.

- 28. Have you ever thought of suicide?
  - Yes, I had thoughts of committing suicide
  - Yes, I have engaged in creating suicidal plans
  - Yes, I tried to commit suicide
  - No (if you chose this answer, please end the survey)
- 29. During the last 12 months, have you experienced sadness from day to day for at least 2 weeks and did not want to do anything?
  - Yes
  - No
- 30. During the last 12 months, have you thought of committing suicide?
  - Yes
  - No
- 31. During the last 12 months, have you engaged in creating suicidal plans?
  - Yes
  - No
- 32. During the last 12 months, have you tried to commit suicide?
  - Yes
  - No
